# Supplementary material
Source: HighWire-hosted journal article supplement (https://bmjopenquality.bmj.com/highwire/filestream/135937/field_highwire_adjunct_files/0/ds5659.docx)
Supplement: ds5659.docx [file ds5659.docx]

Screening request forms and improving patient preparation.

(Fig.3) Run Chart for quantity of utilized Radiopharmaceuticals at PET/CT unit
